# Supplementary material for: Anatomy: An Opportunity for South African Health Science Students to Discuss Their Emotional Responses to Human Remains in the Laboratory
Source: MDPI journal article supplement (doi:10.3390/educsci12060367), 2022-05-25
Supplement: s1 [file s1]

Archive with 1 entries (1 files):
- education-1676788-supplementary.pdf
