# Supplementary material for: Anatomy: An Opportunity for South African Health Science Students to Discuss Their Emotional Responses to Human Remains in the Laboratory
Source: MDPI journal article supplement (doi:10.3390/educsci12060367), 2022-05-25
Supplement: s1 [file s1 › education-1676788-supplementary.pdf]

Urban ☐ Rural ☐

1. **Prior** to entering the human dissection laboratory, which of the following emotions did you experience? Please rate each emotion on a scale of 1 to 5 where 1= not experienced and 5= experienced very strongly.

|                   |                            |                            |                            |                            |                            |                            |
|-------------------|----------------------------|----------------------------|----------------------------|----------------------------|----------------------------|----------------------------|
| Fear              |                            | 1 <input type="checkbox"/> | 2 <input type="checkbox"/> | 3 <input type="checkbox"/> | 4 <input type="checkbox"/> | 5 <input type="checkbox"/> |
| Anxiety           |                            | 1 <input type="checkbox"/> | 2 <input type="checkbox"/> | 3 <input type="checkbox"/> | 4 <input type="checkbox"/> | 5 <input type="checkbox"/> |
| Disgust/revulsion | 1 <input type="checkbox"/> | 2 <input type="checkbox"/> | 3 <input type="checkbox"/> | 4 <input type="checkbox"/> | 5 <input type="checkbox"/> |                            |
| Apprehension      |                            | 1 <input type="checkbox"/> | 2 <input type="checkbox"/> | 3 <input type="checkbox"/> | 4 <input type="checkbox"/> | 5 <input type="checkbox"/> |
| Excitement        | 1 <input type="checkbox"/> | 2 <input type="checkbox"/> | 3 <input type="checkbox"/> | 4 <input type="checkbox"/> | 5 <input type="checkbox"/> |                            |
| Interest          |                            | 1 <input type="checkbox"/> | 2 <input type="checkbox"/> | 3 <input type="checkbox"/> | 4 <input type="checkbox"/> | 5 <input type="checkbox"/> |
| Curiosity         |                            | 1 <input type="checkbox"/> | 2 <input type="checkbox"/> | 3 <input type="checkbox"/> | 4 <input type="checkbox"/> | 5 <input type="checkbox"/> |

2. What other emotions did you experience?

3. If possible, please explain why you felt these emotions.

4. Had you seen a dead body prior to your entry into the human dissection laboratory?

Yes ☐ No ☐

If your response to the above question was yes, please describe when/where/how frequently this occurred: \_\_\_\_\_

Were any of the occasions on which you have seen a dead body traumatic?

Yes ☐ No ☐

5. **Following your first dissection session**, which of the following emotions did you experience? Please rate each emotion on a scale of 1 to 5 where 1= not experienced and 5= experienced very strongly.

|                   |                            |                            |                            |                            |                            |                            |
|-------------------|----------------------------|----------------------------|----------------------------|----------------------------|----------------------------|----------------------------|
| Fear              |                            | 1 <input type="checkbox"/> | 2 <input type="checkbox"/> | 3 <input type="checkbox"/> | 4 <input type="checkbox"/> | 5 <input type="checkbox"/> |
| Anxiety           |                            | 1 <input type="checkbox"/> | 2 <input type="checkbox"/> | 3 <input type="checkbox"/> | 4 <input type="checkbox"/> | 5 <input type="checkbox"/> |
| Disgust/revulsion | 1 <input type="checkbox"/> | 2 <input type="checkbox"/> | 3 <input type="checkbox"/> | 4 <input type="checkbox"/> | 5 <input type="checkbox"/> |                            |
| Apprehension      |                            | 1 <input type="checkbox"/> | 2 <input type="checkbox"/> | 3 <input type="checkbox"/> | 4 <input type="checkbox"/> | 5 <input type="checkbox"/> |
| Excitement        | 1 <input type="checkbox"/> | 2 <input type="checkbox"/> | 3 <input type="checkbox"/> | 4 <input type="checkbox"/> | 5 <input type="checkbox"/> |                            |
| Interest          |                            | 1 <input type="checkbox"/> | 2 <input type="checkbox"/> | 3 <input type="checkbox"/> | 4 <input type="checkbox"/> | 5 <input type="checkbox"/> |
| Curiosity         |                            | 1 <input type="checkbox"/> | 2 <input type="checkbox"/> | 3 <input type="checkbox"/> | 4 <input type="checkbox"/> | 5 <input type="checkbox"/> |

6. What other emotions did you experience?

7. If possible, please explain why you felt these emotions.

8. Have you experienced any of the following physical symptoms related to your dissection experience?

Dizziness ☐ Palpitations ☐

Sweating ☐ Trembling ☐

Nausea ☐ Loss of appetite ☐

Insomnia ☐ Nightmares ☐

Other (Please elaborate): \_\_\_\_\_

9. What was your emotional reaction to cutting the body/dissecting?

10. Did you actively dissect your assigned cadaver in the first two weeks of dissection?

Yes ☐ No ☐

Please give a reason/s for your answer above: \_\_\_\_\_

11. To what extent did the formal dedication ceremony prepare you for the dissection of a human cadaver?

Not prepared      1□      2□      3□      4□      5□      Well prepared

12. Do you have specific beliefs that affected your emotional response/attitude to dissection?

Yes ☐ No ☐

If so, are these religious/cultural/social/ or other influences? Please elaborate. \_\_\_\_\_

13. Which of the following coping mechanisms have you used to deal with your response to dissection during this early period?

Discussion with peers □Discussion with staff in Anatomical Sciences ☐

Discussion with family members ☐

Discussion with religious leaders ☐

Approached the Office of Student Affairs for assistance/ counselling ☐

Denial/detachment ☐

Focusing on religion (e.g. prayer) ☐

Humour □

Creative activities (e.g. journaling/poetry) ☐

Other (please elaborate): \_\_\_\_\_

14. Discuss interventions (eg lectures/talks/support), if any, you think would have been helpful, prior to your first exposure to the cadaver. \_\_\_\_\_

15. Is it important for health sciences students to dissect a human cadaver?

1□                      2□                      3□                      4□                      5□

Not important

Very important

What are your expectations of dissection?\_\_\_\_\_

16. Describe any other factor that has affected your response to dissection, whether positively or negatively.

17. Would you be willing to participate in a focus group? If so please provide your email address:.....

Thank you for participating in this survey!

**Supplementary Table S1: Emotional responses of respondents according to demographic variables of dissection opportunity, sex, population affinity, religious affinity, importance of beliefs, usual place of residence**

|                             |                         |     | Overall score of emotions |             |                            |           | Fear    |                            |           |           | Anxiety                    |           |           |                            | Disgust   |             |                            |           | Apprehension |                            |           |           | Excitement                 |         |           |                            | Interest |       |                            |  | Curiosity |  |  |  |
|-----------------------------|-------------------------|-----|---------------------------|-------------|----------------------------|-----------|---------|----------------------------|-----------|-----------|----------------------------|-----------|-----------|----------------------------|-----------|-------------|----------------------------|-----------|--------------|----------------------------|-----------|-----------|----------------------------|---------|-----------|----------------------------|----------|-------|----------------------------|--|-----------|--|--|--|
|                             |                         | n   | Before                    | After       | Wilcoxon Sign Rank p-value | Before    | After   | Wilcoxon Sign Rank p-value | Before    | After     | Wilcoxon Sign Rank p-value | Before    | After     | Wilcoxon Sign Rank p-value | Before    | After       | Wilcoxon Sign Rank p-value | Before    | After        | Wilcoxon Sign Rank p-value | Before    | After     | Wilcoxon Sign Rank p-value | Before  | After     | Wilcoxon Sign Rank p-value | Before   | After | Wilcoxon Sign Rank p-value |  |           |  |  |  |
| Dissection opportunity      | Dissector               | 355 | 3 (-1.7)                  | 5 (0.8)     | 0.00                       | 2 (1.3)   | 1 (1.2) | 0.00                       | 3 (2.4)   | 1 (1.2)   | 0.00                       | 1 (1.2)   | 2 (1.3)   | 0.00                       | 2 (1.3)   | 2 (1.3)     | 0.00                       | 3 (2.4)   | 3 (2.4)      | 0.26                       | 4 (3.5)   | 4 (3.5)   | 0.74                       | 4 (4.5) | 4 (3.5)   | 0.00                       |          |       |                            |  |           |  |  |  |
|                             | Non-dissectors          | 115 | 4 (-1.7)                  | 4 (0.7)     | 0.06                       | 2 (1.3)   | 1 (1.2) | 0.00                       | 2 (1.3)   | 1 (1.2)   | 0.00                       | 1 (1.2)   | 1 (1.2)   | 0.33                       | 2 (1.3)   | 1 (1.2)     | 0.00                       | 3 (2.4)   | 3 (2.4)      | 0.17                       | 4 (3.5)   | 4 (3.5)   | 0.69                       | 4 (3.5) | 4 (3.5)   | 0.03                       |          |       |                            |  |           |  |  |  |
|                             | Kruskall Wallis p-value |     | 0.72                      | 0.51        |                            | 0.46      | 0.3     | 0.00                       | 0.28      | 0.69      | 0.00                       | 0.06      | 0.00      | 0.25                       | 0.13      |             | 0.20                       | 0.12      |              | 0.85                       | 0.67      |           |                            |         |           |                            |          |       |                            |  |           |  |  |  |
| Sex                         | Male                    | 120 | 5 (2.8)                   | 6 (3.8.5)   | 0.12                       | 1 (1.2)   | 1 (1.1) | 0.00                       | 2 (1.3)   | 1 (1.2)   | 0.00                       | 1 (1.2)   | 1 (1.2)   | 0.06                       | 2 (1.3)   | 1 (1.2)     | 0.08                       | 4 (3.5)   | 4 (3.5)      | 0.06                       | 4 (3.5)   | 4 (3.5)   | 0.56                       | 4 (4.5) | 4 (3.5)   | 0.08                       |          |       |                            |  |           |  |  |  |
|                             | Female                  | 359 | 3 (-2.6)                  | 4 (-1.7)    | 0.00                       | 2 (1.3)   | 1 (1.2) | 0.00                       | 3 (1.4)   | 2 (1.3)   | 0.00                       | 1 (1.2)   | 1 (1.3)   | 0.00                       | 2 (1.3)   | 2 (1.3)     | 0.00                       | 3 (2.4)   | 3 (2.4)      | 0.36                       | 4 (3.5)   | 4 (3.5)   | 0.25                       | 4 (3.5) | 4 (3.5)   | 0.00                       |          |       |                            |  |           |  |  |  |
|                             | Kruskall Wallis p-value |     | 0.00                      | 0.00        | 0.00                       | 0.10      | 0.00    | 0.00                       | 0.51      | 0.31      | 0.00                       | 0.07      | 0.00      | 0.00                       | 0.00      | 0.00        | 0.01                       | 0.76      | 0.09         | 0.22                       |           |           |                            |         |           |                            |          |       |                            |  |           |  |  |  |
| Population affinity         | SAB                     | 158 | 4 (-2.8)                  | 4.5 (0.8)   | 0.00                       | 2 (1.3)   | 1 (1.2) | 0.00                       | 2 (1.3)   | 1 (1.2)   | 0.00                       | 1 (1.2)   | 1 (1.2)   | 0.19                       | 2 (1.3)   | 1 (1.2.5)   | 0.01                       | 3 (2.4)   | 3 (2.4)      | 0.24                       | 4 (3.5)   | 4 (3.5)   | 0.32                       | 4 (3.5) | 4 (3.5)   | 0.15                       |          |       |                            |  |           |  |  |  |
|                             | SAW                     | 161 | 3 (-1.7)                  | 5 (0.8)     | 0.00                       | 2 (1.3)   | 1 (1.2) | 0.00                       | 3 (2.4)   | 2 (1.3)   | 0.00                       | 1 (1.2)   | 2 (1.3)   | 0.00                       | 3 (2.3)   | 2 (1.3)     | 0.00                       | 4 (3.4)   | 3 (2.4)      | 0.05                       | 4 (3.5)   | 4 (3.5)   | 0.43                       | 4 (4.5) | 4 (3.5)   | 0.02                       |          |       |                            |  |           |  |  |  |
|                             | Other                   | 115 | 3 (-1.7)                  | 4 (0.7)     | 0.08                       | 2 (1.3)   | 1 (1.2) | 0.00                       | 2 (1.3)   | 1 (1.2)   | 0.00                       | 1 (1.2)   | 1 (1.3)   | 0.02                       | 2 (1.3)   | 2 (1.3)     | 0.00                       | 3 (2.4)   | 3 (2.4)      | 0.24                       | 4 (3.5)   | 4 (3.5)   | 0.16                       | 4 (3.5) | 4 (3.5)   | 0.05                       |          |       |                            |  |           |  |  |  |
|                             | DNI                     | 46  | 6 (0.8)                   | 6 (1.7)     | 0.65                       | 1 (1.3)   | 1 (1.1) | 0.00                       | 2 (1.4)   | 1 (1.2)   | 0.00                       | 1 (1.2)   | 1 (1.2)   | 0.04                       | 2 (1.3)   | 2 (1.3)     | 0.53                       | 4 (3.4)   | 3 (2.4)      | 0.04                       | 4 (4.5)   | 4 (4.5)   | 0.68                       | 4 (4.5) | 4 (4.5)   | 0.09                       |          |       |                            |  |           |  |  |  |
|                             | Kruskall Wallis p-value |     | 0.19                      | 0.71        | 0.37                       | 0.63      | 0.01    | 0.03                       | 0.62      | 0.33      | 0.00                       | 0.13      | 0.06      | 0.73                       | 0.02      | 0.03        | 0.40                       | 0.67      |              |                            |           |           |                            |         |           |                            |          |       |                            |  |           |  |  |  |
| Religious affinity          | Christianity            | 302 | 3 (-2.7)                  | 4 (0.8)     | 0.00                       | 2 (1.3)   | 1 (1.2) | 0.00                       | 2 (1.4)   | 1 (1.2)   | 0.00                       | 1 (1.2)   | 1 (1.3)   | 0.01                       | 2 (1.3)   | 2 (1.3)     | 0.00                       | 3 (2.4)   | 3 (2.4)      | 0.38                       | 4 (3.5)   | 4 (3.5)   | 0.71                       | 4 (3.5) | 4 (3.5)   | 0.00                       |          |       |                            |  |           |  |  |  |
|                             | Islam                   | 54  | 3 (0.7)                   | 4 (0.6)     | 0.30                       | 1 (1.2)   | 1 (1.2) | 0.04                       | 2 (1.3)   | 1 (1.2)   | 0.01                       | 2 (1.2.5) | 2 (1.3)   | 0.39                       | 2 (1.3)   | 2 (1.3)     | 0.01                       | 3 (2.4)   | 3 (2.4)      | 0.97                       | 4 (3.5)   | 4 (3.5)   | 0.37                       | 4 (3.5) | 4 (3.5)   | 0.18                       |          |       |                            |  |           |  |  |  |
|                             | Judaism                 | 22  | 1 (-5.6)                  | 4 (-4.7)    | 0.02                       | 2 (2.3)   | 1 (1.2) | 0.00                       | 3.5 (2.4) | 2 (1.3)   | 0.00                       | 1 (1.2)   | 2 (1.4)   | 0.01                       | 3 (2.4)   | 2 (2.3)     | 0.25                       | 4 (3.4)   | 3 (3.4)      | 0.24                       | 4 (3.5)   | 4.5 (3.5) | 0.35                       | 4 (3.5) | 4 (3.5)   | 0.48                       |          |       |                            |  |           |  |  |  |
|                             | Hinduism                | 25  | 4 (-1.5)                  | 6 (4.8)     | 0.01                       | 2 (1.5.3) | 1 (1.2) | 0.00                       | 3 (2.4)   | 2 (1.2)   | 0.00                       | 1 (1.2)   | 1 (1.2)   | 0.40                       | 3 (2.3)   | 2 (1.3)     | 0.00                       | 4 (3.5)   | 4 (3.4)      | 0.96                       | 4 (3.5)   | 4 (4.5)   | 0.53                       | 4 (3.5) | 4 (4.5)   | 0.59                       |          |       |                            |  |           |  |  |  |
|                             | Tamil                   | 2   | 0 (-7.7)                  | -1.5 (-6.3) | -                          | 2 (1.3)   | 3 (3.3) | -                          | 3 (1.5)   | 4 (3.5)   | -                          | 1.5 (1.2) | 1 (1.1)   | -                          | 3.5 (2.5) | 3.5 (2.5)   | -                          | 1.5 (1.2) | 1.5 (1.2)    | -                          | 4.5 (4.5) | 4.5 (4.5) | -                          | 4 (3.5) | 4 (3.5)   | -                          |          |       |                            |  |           |  |  |  |
|                             | Atheism                 | 9   | 6 (2.10)                  | 7 (7.10)    | 0.50                       | 1 (1.2)   | 1 (1.1) | 0.18                       | 2 (2.4)   | 1 (1.3)   | 0.35                       | 1 (1.1)   | 2 (1.2)   | 0.22                       | 2 (1.4)   | 2 (1.3)     | 0.79                       | 5 (4.5)   | 4 (4.5)      | 0.72                       | 5 (4.5)   | 5 (4.5)   | 1.00                       | 4 (4.5) | 5 (4.5)   | 0.69                       |          |       |                            |  |           |  |  |  |
|                             | Agnosticism             | 8   | 8 (6.8.5)                 | 7 (5.8.5)   | 1.00                       | 1 (1.1)   | 1 (1.1) | -                          | 2 (1.3)   | 1 (1.1.5) | 0.11                       | 1 (1.2)   | 1 (1.2)   | 1.00                       | 2.5 (2.3) | 1.5 (1.3.5) | 0.89                       | 4 (4.5)   | 4 (3.5.5)    | 0.35                       | 5 (5.5)   | 4.5 (4.5) | 0.07                       | 5 (5.5) | 4.5 (4.5) | 0.07                       |          |       |                            |  |           |  |  |  |
|                             | None                    | 18  | 7 (1.8)                   | 4 (0.9)     | 0.14                       | 1 (1.2)   | 1 (1.2) | 0.00                       | 2 (1.3)   | 1 (1.2)   | 0.17                       | 1 (1.2)   | 1 (1.3)   | 0.21                       | 1.5 (1.3) | 1 (1.2)     | 0.88                       | 4.5 (3.5) | 3 (2.5)      | 0.00                       | 4 (4.5)   | 4.5 (4.5) | 0.01                       | 5 (4.5) | 4.5 (4.5) | 0.39                       |          |       |                            |  |           |  |  |  |
|                             | No response             | 37  | 4 (-3.8)                  | 4 (-1.7)    | 0.26                       | 2 (1.3)   | 1 (1.2) | 0.00                       | 2 (1.4)   | 1 (1.3)   | 0.00                       | 1 (1.2)   | 1 (1.2)   | 0.03                       | 2 (1.3)   | 1 (1.2)     | 0.03                       | 3 (2.4)   | 3 (2.4)      | 0.54                       | 4 (3.4)   | 4 (3.4)   | 1.00                       | 4 (3.5) | 4 (2.4)   | 0.11                       |          |       |                            |  |           |  |  |  |
|                             | Kruskall Wallis p-value |     | 0.12                      | 0.22        | 0.09                       | 0.30      | 0.08    | 0.25                       | 0.57      | 0.25      | 0.27                       | 0.47      | 0.01      | 0.09                       | 0.08      | 0.37        | 0.10                       | 0.58      |              |                            |           |           |                            |         |           |                            |          |       |                            |  |           |  |  |  |
| Importance of belief system | Very important          | 234 | 2 (-2.6)                  | 4 (0.7)     | 0.00                       | 2 (1.3)   | 1 (1.2) | 0.00                       | 2 (1.4)   | 1 (1.2)   | 0.00                       | 1 (1.3)   | 1 (1.3)   | 0.03                       | 2 (1.3)   | 2 (1.3)     | 0.00                       | 3 (2.4)   | 3 (2.4)      | 0.39                       | 4 (3.5)   | 4 (3.5)   | 0.03                       | 4 (3.5) | 4 (3.5)   | 0.40                       |          |       |                            |  |           |  |  |  |
|                             | Important               | 102 | 4 (-2.8)                  | 4 (0.7)     | 0.27                       | 2 (1.3)   | 1 (1.2) | 0.00                       | 2 (1.4)   | 1 (1.3)   | 0.00                       | 1 (1.2)   | 1 (1.2)   | 0.06                       | 2 (1.3)   | 2 (1.3)     | 0.06                       | 3 (2.4)   | 3 (2.4)      | 0.07                       | 4 (3.5)   | 4 (3.5)   | 0.33                       | 4 (4.5) | 4 (3.5)   | 0.01                       |          |       |                            |  |           |  |  |  |
|                             | Neutral                 | 76  | 4 (1.7)                   | 5.5 (1.8)   | 0.15                       | 1 (1.3)   | 1 (1.2) | 0.00                       | 2 (1.3)   | 1 (1.2)   | 0.00                       | 1 (1.2)   | 1.5 (1.2) | 0.01                       | 2 (1.3)   | 2 (1.3)     | 0.00                       | 4 (3.4)   | 4 (3.4)      | 0.31                       | 4 (4.5)   | 4 (3.5)   | 0.51                       | 4 (4.5) | 4 (3.5)   | 0.03                       |          |       |                            |  |           |  |  |  |
|                             | Not important           | 65  | 5 (1.8)                   | 6 (1.7)     | 0.90                       | 1 (1.2)   | 1 (1.1) | 0.04                       | 2 (1.4)   | 1 (1.2)   | 0.00                       | 1 (1.2)   | 1 (1.2)   | 0.01                       | 2 (1.3)   | 1 (1.3)     | 0.00                       | 4 (3.5)   | 4 (3.5)      | 0.03                       | 4 (3.5)   | 4 (3.5)   | 0.13                       | 4 (4.5) | 4 (3.5)   | 0.02                       |          |       |                            |  |           |  |  |  |
|                             | Kruskall Wallis p-value |     | 0.01                      | 0.51        | 0.02                       | 0.52      | 0.63    | 0.49                       | 0.04      | 0.68      | 0.19                       | 0.94      | 0.00      | 0.17                       | 0.11      | 0.94        | 0.14                       | 0.91      |              |                            |           |           |                            |         |           |                            |          |       |                            |  |           |  |  |  |
| Usual place of residence    | Urban                   | 423 | 3 (-1.7)                  | 5 (0.7)     | 0.00                       | 2 (1.3)   | 1 (1.2) | 0.00                       | 2 (1.4)   | 1 (1.2)   | 0.00                       | 1 (1.2)   | 1 (1.3)   | 0.07                       | 2 (1.3)   | 2 (1.3)     | 0.00                       | 3 (2.4)   | 3 (2.4)      | 0.00                       | 4 (3.5)   | 4 (3.5)   | 0.00                       | 4 (3.5) | 4 (3.5)   | 0.02                       |          |       |                            |  |           |  |  |  |
|                             | Rural                   | 57  | 4 (1.8)                   | 5 (1.8)     | 0.54                       | 2 (1.3)   | 1 (1.2) | 0.00                       | 2 (1.3)   | 1 (1.3)   | 0.00                       | 1 (1.3)   | 2 (1.2)   | 0.86                       | 2 (1.3)   | 2 (1.3)     | 0.35                       | 3 (3.5)   | 4 (2.5.5)    | 0.00                       | 4 (3.5)   | 4 (3.5)   | 0.01                       | 4 (3.5) | 4 (3.5)   | 0.11                       |          |       |                            |  |           |  |  |  |
|                             | Kruskall Wallis p-value |     | 0.47                      | 0.89        | 0.86                       | 0.78      | 0.16    | 0.83                       | 0.75      | 0.85      | 0.31                       | 0.58      | 0.59      | 0.11                       | 0.74      | 0.31        | 0.85                       | 0.57      |              |                            |           |           |                            |         |           |                            |          |       |                            |  |           |  |  |  |
